# Supplementary material for: Rapid construction of insulated genetic circuits via synthetic sequence-guided isothermal assembly
Source: Oxford University Press journal article supplement (doi:10.1093/nar/gkt860), 2013-09-26
Supplement: gkt860_Supplementary_Data.zip [file gkt860_Supplementary_Data.zip]

## SUPPORTING INFORMATION

**Table S1. 10 designed UNS sequences and their properties**

| UNS# | Sequence                                  | GC%  | No AT/GC tracts* | Ends with C/G* | No Start Codons* | Restriction sites OK* | Hairpin Max Tm (°C)* | Lacks promoter-like sequences* | Max BLAST Score* |
|------|-------------------------------------------|------|------------------|----------------|------------------|-----------------------|----------------------|--------------------------------|------------------|
| 1    | CATTACTCGCATCCATTCTCAGGCTGTCTCGTCTCGTCTC  | 52.5 | ✓                | ✓              | ✓                | ✓                     | 27.1                 | ✓                              | 26.3             |
| 2    | GCTGGGAGTTCGTAGACGGAAACAAACGCAGAATCCAAGC  | 52.5 | ✓                | ✓              | ✓                | ✓                     | 39.2                 | ✓                              | 32.2             |
| 3    | GCACTGAAGGTCCTCAATCGCACTGGAAACATCAAGGTCG  | 52.5 | ✓                | ✓              | ✓                | ✓                     | 33.9                 | ✓                              | 26.3             |
| 4    | CTGACCTCCTGCCAGCAATAGTAAGACAACACGCAAAGTC  | 50.0 | ✓                | ✓              | ✓                | ✓                     | 33.5                 | ✓                              | 28.2             |
| 5    | GAGCCAACCTCCCTTTACAACCTCACTCAAGTCCGTTAGAG | 50.0 | ✓                | ✓              | ✓                | ✓                     | 38.5                 | ✓                              | 26.3             |
| 6    | CTCGTTCGCTGCCACCTAAGAATACTCTACGGTCACATAC  | 50.0 | ✓                | ✓              | ✓                | ✓                     | 36.6                 | ✓                              | 26.3             |
| 7    | CAAGACGCTGGCTCTGACATTTCCGCTACTGAACTACTCG  | 52.5 | ✓                | ✓              | ✓                | ✓                     | 26                   | ✓                              | 26.3             |
| 8    | CCTCGTCTCAACCAAAGCAATCAACCCATCAACCACCTGG  | 52.5 | ✓                | ✓              | ✓                | ✓                     | 39                   | ✓                              | 30.2             |
| X    | CCAGGATACATAGATTACCACAACCTCCGAGCCCTTCCACC | 52.5 | ✓                | ✓              | ✓                | ✓                     | 30.7                 | ✓                              | 24.3             |
| 9    | GTTCTTATCATCTGGCGAATCGGACCCACAAGAGCACTG   | 52.5 | ✓                | ✓              | ✓                | ✓                     | 30.8                 | ✓                              | 28.2             |

\* See Methods in main text for specific details of each category.

**Table S2. Predicted hybridization Tm (°C) of UNS pairs**

|   | 1  | 2  | 3  | 4  | 5  | 6  | 7  | 8  | X  | 9  |
|---|----|----|----|----|----|----|----|----|----|----|
| 1 | 81 |    |    |    |    |    |    |    |    |    |
| 2 | -5 | 79 |    |    |    |    |    |    |    |    |
| 3 | -5 | 0  | 79 |    |    |    |    |    |    |    |
| 4 | -5 | -5 | 4  | 79 |    |    |    |    |    |    |
| 5 | -5 | -5 | -5 | -5 | 79 |    |    |    |    |    |
| 6 | -5 | -5 | -5 | -5 | -5 | 78 |    |    |    |    |
| 7 | 5  | -5 | 1  | -5 | -5 | 7  | 80 |    |    |    |
| 8 | -5 | -5 | -2 | 3  | 6  | -5 | -5 | 79 |    |    |
| X | -5 | -5 | -5 | -5 | -5 | -5 | -5 | 16 | 78 |    |
| 9 | -5 | -5 | 18 | -5 | -5 | -5 | -2 | 18 | 17 | 81 |

**Table S3. Part and destination vectors used in this work**

| Basic Part vectors        |                                                                                |                                                                                                                                                                                                                     |            |                                       |                 |                   |                 |
|---------------------------|--------------------------------------------------------------------------------|---------------------------------------------------------------------------------------------------------------------------------------------------------------------------------------------------------------------|------------|---------------------------------------|-----------------|-------------------|-----------------|
| Plasmid                   | Part Contains:                                                                 | Construction                                                                                                                                                                                                        | Resistance | Copy Number                           | UN Digest Sites | UN+1 Digest Sites | UX Digest Sites |
| pFL_U1U2                  | U1-MCS-U2-UX                                                                   | MfeI/NsiI digested gBlock_U1U2_FL was ligated into EcoRI/PstI digested BioBrick-modified pDTSmart vector (IDT).                                                                                                     | Amp        | ~500                                  | AscI/BspMI      | MauBI/BbsI        | MreI/BsaI       |
| pFL_U2U3                  | U2-MCS-U3-UX                                                                   | MfeI/NsiI digested gBlock_U2U3_FL was ligated into EcoRI/PstI digested BioBrick-modified pDTSmart vector (IDT).                                                                                                     | Amp        | ~500                                  | AscI/BspMI      | MauBI/BbsI        | MreI/BsaI       |
| pFL_U3U4                  | U3-MCS-U4-UX                                                                   | MfeI/NsiI digested gBlock_U3U4_FL was ligated into EcoRI/PstI digested BioBrick-modified pDTSmart vector (IDT).                                                                                                     | Amp        | ~500                                  | AscI/BspMI      | MauBI/BbsI        | MreI/BsaI       |
| pFL_U4U5                  | U4-MCS-U5-UX                                                                   | MfeI/NsiI digested gBlock_U4U5_FL was ligated into EcoRI/PstI digested BioBrick-modified pDTSmart vector (IDT).                                                                                                     | Amp        | ~500                                  | AscI/BspMI      | MauBI/BbsI        | MreI/BsaI       |
| pJT170                    | U1-PT7-MCS-TT7-U2-UX                                                           | pETDuet-1 digested with XbaI, blunted with klenow fragment, and digested again with DraIII, followed by ligation with phosphorylated, DraIII-digested gBlockU1U2. SphI/MfeI then digested, blunted, and re-ligated. | Amp        | ~40                                   | AflII/SapI      | MauBI/BbsI        | MreI/BsaI       |
| pJT172                    | U2-PT7-MCS-TT7-U3-UX                                                           | pETDuet-1 digested with XbaI, blunted with klenow fragment, and digested again with DraIII, followed by ligation with phosphorylated, DraIII-digested gBlockU2U3. SphI/MfeI then digested, blunted, and re-ligated. | Amp        | ~40                                   | AflII/SapI      | MauBI/BbsI        | MreI/BsaI       |
| pJT174                    | U3-PT7-MCS-TT7-U4-UX                                                           | pETDuet-1 digested with XbaI, blunted with klenow fragment, and digested again with DraIII, followed by ligation with phosphorylated, DraIII-digested gBlockU3U4. SphI/MfeI then digested, blunted, and re-ligated. | Amp        | ~40                                   | AflII/SapI      | MauBI/BbsI        | MreI/BsaI       |
| pJT176                    | U4-PT7-MCS-TT7-U5-UX                                                           | pETDuet-1 digested with XbaI, blunted with klenow fragment, and digested again with DraIII, followed by ligation with phosphorylated, DraIII-digested gBlockU4U5. SphI/MfeI then digested, blunted, and re-ligated. | Amp        | ~40                                   | AflII/SapI      | MauBI/BbsI        | MreI/BsaI       |
| pJT260                    | U1-Ptrc-mCherry-[TB1006]^2-TT7-U2-UX                                           | Described below.                                                                                                                                                                                                    | Amp        | ~40                                   | AflII/SapI      | MauBI/BbsI        | MreI/BsaI       |
| pJT288                    | U2-Ptrc-mCherry-[TB1006]^2-TT7-U3-UX                                           | Clal/XhoI fragment of pJT260 cloned into Clal/XhoI-digested pJT172.                                                                                                                                                 | Amp        | ~40                                   | AflII/SapI      | MauBI/BbsI        | MreI/BsaI       |
| pJT290                    | U3-Ptrc-mCherry-[TB1006]^2-TT7-U4-UX                                           | Clal/XhoI fragment of pJT260 cloned into Clal/XhoI-digested pJT174.                                                                                                                                                 | Amp        | ~40                                   | AflII/SapI      | MauBI/BbsI        | MreI/BsaI       |
| pJT292                    | U4-Ptrc-mCherry-[TB1006]^2-TT7-U5-UX                                           | Clal/XhoI fragment of pJT260 cloned into Clal/XhoI-digested pJT176.                                                                                                                                                 | Amp        | ~40                                   | AflII/SapI      | MauBI/BbsI        | MreI/BsaI       |
| Basic Destination vectors |                                                                                |                                                                                                                                                                                                                     |            |                                       |                 |                   |                 |
| Plasmid                   | Destination UNSes & Backbone:                                                  | Construction                                                                                                                                                                                                        | Resistance | Copy Number                           | U1 Digest Sites | UX Digest Sites   |                 |
| pDestET                   | U1-UX. Backbone: pETDuet-1 (Novagen) lacking promoter, MCS, T7Term and F1 Ori. | gBlock_U1UX_A digested with SphI/XbaI and ligated into SphI/AvrII-digested pETDuet-1. Resulting plasmid then digested with BlnI/SspI to eliminate F1 Ori, blunted with Klenow fragment, and re-ligated.             | Amp        | ~40                                   | MauBI/BbsI      | AvrII/Bpml        |                 |
| pDestBAC                  | U1-UX. Backbone: pETCoco-1 (Novagen) with stop codon at NheI site.             | pETCoCo-1 digested with NheI, blunted with KF, and re-ligated to generate a stop codon. Resulting plasmid then digested with HindIII/AvrII and HindIII/XbaI digested gBlock_U1UX_B ligated in.                      | Cam        | ~1 (Amplifiable to 40 with arabinose) | MauBI/BbsI      | AvrII/Bpml        |                 |

| pDestRmce BAC                                                                | U1-UX. Backbone: pETCoco-1 containing cassette for RMCE.                   | Multiple steps. In short, the T7 Promoter, MCS and LoxP site from pETCoco-1 were removed and replaced with a U1-UX cassette and the inverted LoxP sites required for RMCE-based integration (Ref. #33 in main text).                                                                     | Cam        | ~1 (Amplifiable to 40 with arabinose) | MauBI/BbsI     | AvrII/Bpml       |                |
|------------------------------------------------------------------------------|----------------------------------------------------------------------------|------------------------------------------------------------------------------------------------------------------------------------------------------------------------------------------------------------------------------------------------------------------------------------------|------------|---------------------------------------|----------------|------------------|----------------|
| pDestPB BAC                                                                  | U1-UX. Backbone: pETCoco-1 containing cassette for PiggyBAC transposition. | Multiple steps. In short, the T7 Promoter and MCS from pETCoco-1 were removed and replaced with inverted terminal repeats (ITRs) containing the U1-UX cassette, HS4 and a blasticidin resistance gene. The PiggyBAC transposase was cloned outside of the ITRs. (Ref. #33 in main text). | Cam        | ~1 (Amplifiable to 40 with arabinose) | MauBI/BbsI     | AvrII/Bpml       |                |
| <b>Part vectors for terminator testing</b>                                   |                                                                            |                                                                                                                                                                                                                                                                                          |            |                                       |                |                  |                |
| Plasmid                                                                      | Part Contains:                                                             | Construction                                                                                                                                                                                                                                                                             | Resistance | Copy Number                           | UN Digest Site | UN+1 Digest Site | UX Digest Site |
| pJT233                                                                       | U1-PT7-mCherry-TT7-U2-UX                                                   | NcoI/XbaI mCherry fragment of pDHL374 ligated into NcoI/SpeI-digested pJT170.                                                                                                                                                                                                            | Amp        | ~40                                   | AfIII/SapI     | MauBI/BbsI       | MreI/BsaI      |
| pJT246                                                                       | U1-Ptrc-mCherry-TT7-U2-UX                                                  | Ptrc fragments were generated by annealing primers JT326 and JT328, filling in the gaps with Klenow fragment, digesting with ClaI/XbaI, and ligating into ClaI/XbaI-digested pJT233.                                                                                                     | Amp        | ~40                                   | AfIII/SapI     | MauBI/BbsI       | MreI/BsaI      |
| pJT257                                                                       | U1-Ptrc-mCherry-TB1006-TT7-U2-UX                                           | BBa_B1006 terminator fragments were generated by annealing phosphorylated primers JT356 and JT357, and ligating into NheI/PstI-digested pJT246.                                                                                                                                          | Amp        | ~40                                   | AfIII/SapI     | MauBI/BbsI       | MreI/BsaI      |
| pJT260                                                                       | U1-Ptrc-mCherry-[TB1006]^2-TT7-U2-UX                                       | BBa_B1006 terminator fragment ligated into SpeI/PstI-digested pJT257.                                                                                                                                                                                                                    | Amp        | ~40                                   | AfIII/SapI     | MauBI/BbsI       | MreI/BsaI      |
| pJT321                                                                       | U1-Ptrc-mCherry-[TB1006]^3-TT7-U2-UX                                       | BBa_B1006 terminator fragment ligated into SpeI/PstI-digested pJT260.                                                                                                                                                                                                                    | Amp        | ~40                                   | AfIII/SapI     | MauBI/BbsI       | MreI/BsaI      |
| pJT318                                                                       | U1-Ptrc-mCherry-U2-UX                                                      | pJT260 digested with BamHI/Agel, blunted with klenow fragment, and re-ligated to remove all terminators.                                                                                                                                                                                 | Amp        | ~40                                   | AfIII/SapI     | MauBI/BbsI       | MreI/BsaI      |
| pJT320                                                                       | U1-Ptrc-mCherry-TT7-U2-UX                                                  | pJT260 digested with BamHI/SpeI, blunted with klenow fragment, and re-ligated to remove all but the T7term.                                                                                                                                                                              | Amp        | ~40                                   | AfIII/SapI     | MauBI/BbsI       | MreI/BsaI      |
| pJT241                                                                       | U2-PT7-EGFP-TT7-U3-UX                                                      | NcoI/XbaI EGFP fragment from pEGFP (Clontech) ligated into NcoI/SpeI-digested pJT172.                                                                                                                                                                                                    | Amp        | ~40                                   | AfIII/SapI     | MauBI/BbsI       | MreI/BsaI      |
| pJT323                                                                       | U1-Ptrc-EGFP-[TB1006]^2-TT7-U2-UX                                          | NcoI/BamHI EGFP fragment of pJT241 ligated into NcoI/BamHI-digested pJT260.                                                                                                                                                                                                              | Amp        | ~40                                   | AfIII/SapI     | MauBI/BbsI       | MreI/BsaI      |
| pJT336                                                                       | U2-Ptrc-EGFP-[TB1006]^2-TT7-U3-UX                                          | XbaI/XhoI fragment of pJT323 ligated into XbaI/XhoI-digested pJT288.                                                                                                                                                                                                                     | Amp        | ~40                                   | AfIII/SapI     | MauBI/BbsI       | MreI/BsaI      |
| pJT345                                                                       | U2-EGFP-[TB1006]^2-TT7-U3-UX                                               | pJT336 digested with ClaI/XbaI, blunted with klenow fragment, and re-ligated to remove the promoter.                                                                                                                                                                                     | Amp        | ~40                                   | AfIII/SapI     | MauBI/BbsI       | MreI/BsaI      |
| <b>Part vectors for testing UNS effects on proximal expression cassettes</b> |                                                                            |                                                                                                                                                                                                                                                                                          |            |                                       |                |                  |                |
| Plasmid                                                                      | Part Contains:                                                             | Construction                                                                                                                                                                                                                                                                             | Resistance | Copy Number                           | UN Digest Site | UN+1 Digest Site | UX Digest Site |
| pJT316                                                                       | U1-mCherry-[TB1006]^2-TT7-U2-UX                                            | pJT260 digested with ClaI/XbaI, blunted with klenow fragment, and re-ligated to remove the promoter.                                                                                                                                                                                     | Amp        | ~40                                   | AfIII/SapI     | MauBI/BbsI       | MreI/BsaI      |
| pJT339                                                                       | U2-mCherry-[TB1006]^2-TT7-U3-UX                                            | pJT288 digested with ClaI/XbaI, blunted with klenow fragment, and re-ligated to remove the promoter.                                                                                                                                                                                     | Amp        | ~40                                   | AfIII/SapI     | MauBI/BbsI       | MreI/BsaI      |
| pJT341                                                                       | U3-mCherry-[TB1006]^2-TT7-U4-UX                                            | pJT290 digested with ClaI/XbaI, blunted with klenow fragment, and re-ligated to remove the promoter.                                                                                                                                                                                     | Amp        | ~40                                   | AfIII/SapI     | MauBI/BbsI       | MreI/BsaI      |

| pJT343                                                                           | U4-mCherry-[TB1006]^2-TT7-U5-UX      | pJT292 digested with ClaI/XbaI, blunted with klenow fragment, and re-ligated to remove the promoter.                                                                               | Amp        | ~40         | AfIII/SapI     | MauBI/BbsI       | MreI/BsaI      |
|----------------------------------------------------------------------------------|--------------------------------------|------------------------------------------------------------------------------------------------------------------------------------------------------------------------------------|------------|-------------|----------------|------------------|----------------|
| pJT260                                                                           | U1-Ptrc-mCherry-[TB1006]^2-TT7-U2-UX | Described above                                                                                                                                                                    | Amp        | ~40         | AfIII/SapI     | MauBI/BbsI       | MreI/BsaI      |
| pJT288                                                                           | U2-Ptrc-mCherry-[TB1006]^2-TT7-U3-UX | Described above                                                                                                                                                                    | Amp        | ~40         | AfIII/SapI     | MauBI/BbsI       | MreI/BsaI      |
| pJT290                                                                           | U3-Ptrc-mCherry-[TB1006]^2-TT7-U4-UX | Described above                                                                                                                                                                    | Amp        | ~40         | AfIII/SapI     | MauBI/BbsI       | MreI/BsaI      |
| pJT292                                                                           | U4-Ptrc-mCherry-[TB1006]^2-TT7-U5-UX | Described above                                                                                                                                                                    | Amp        | ~40         | AfIII/SapI     | MauBI/BbsI       | MreI/BsaI      |
| <b>Part vectors for promoter titration and mCherry/EGFP library construction</b> |                                      |                                                                                                                                                                                    |            |             |                |                  |                |
| Plasmid                                                                          | Part Contains:                       | Construction                                                                                                                                                                       | Resistance | Copy Number | UN Digest Site | UN+1 Digest Site | UX Digest Site |
| pJT301                                                                           | U1-P740-mCherry-[TB1006]^2-TT7-U2-UX | Primers JT407/408 phosphorylated, annealed and ligated into ClaI/XbaI-digested pJT260.                                                                                             | Amp        | ~40         | AfIII/SapI     | MauBI/BbsI       | MreI/BsaI      |
| pJT303                                                                           | U1-P199-mCherry-[TB1006]^2-TT7-U2-UX | Primers JT409/410 phosphorylated, annealed and ligated into ClaI/XbaI-digested pJT260.                                                                                             | Amp        | ~40         | AfIII/SapI     | MauBI/BbsI       | MreI/BsaI      |
| pJT305                                                                           | U1-P048-mCherry-[TB1006]^2-TT7-U2-UX | Primers JT411/412 phosphorylated, annealed and ligated into ClaI/XbaI-digested pJT260.                                                                                             | Amp        | ~40         | AfIII/SapI     | MauBI/BbsI       | MreI/BsaI      |
| pJT309                                                                           | U1-P003-mCherry-[TB1006]^2-TT7-U2-UX | Primers JT415/416 phosphorylated, annealed and ligated into ClaI/XbaI-digested pJT260.                                                                                             | Amp        | ~40         | AfIII/SapI     | MauBI/BbsI       | MreI/BsaI      |
| pJT353                                                                           | U2-P740-EGFP-[TB1006]^2-TT7-U3-UX    | Primers JT407/408 phosphorylated, annealed and ligated into ClaI/XbaI-digested pJT336.                                                                                             | Amp        | ~40         | AfIII/SapI     | MauBI/BbsI       | MreI/BsaI      |
| pJT351                                                                           | U2-P199-EGFP-[TB1006]^2-TT7-U3-UX    | Primers JT409/410 phosphorylated, annealed and ligated into ClaI/XbaI-digested pJT336.                                                                                             | Amp        | ~40         | AfIII/SapI     | MauBI/BbsI       | MreI/BsaI      |
| pJT349                                                                           | U2-P048-EGFP-[TB1006]^2-TT7-U3-UX    | Primers JT411/412 phosphorylated, annealed and ligated into ClaI/XbaI-digested pJT336.                                                                                             | Amp        | ~40         | AfIII/SapI     | MauBI/BbsI       | MreI/BsaI      |
| pJT347                                                                           | U2-P003-EGFP-[TB1006]^2-TT7-U3-UX    | Primers JT415/416 phosphorylated, annealed and ligated into ClaI/XbaI-digested pJT336.                                                                                             | Amp        | ~40         | AfIII/SapI     | MauBI/BbsI       | MreI/BsaI      |
| <b>Deoxychromoviridans part vectors</b>                                          |                                      |                                                                                                                                                                                    |            |             |                |                  |                |
| Plasmid                                                                          | Part Contains:                       | Construction                                                                                                                                                                       | Resistance | Copy Number | UN Digest Site | UN+1 Digest Site | UX Digest Site |
| pJT369                                                                           | U1-P003-VioB-[TB1006]^2-TT7-U2-UX    | Primers JT446/447 phosphorylated, annealed and ligated into pVioB to remove internal XbaI site. XbaI-SspI fragment of resulting vector then cloned into XbaI/StuI-digested pJT309. | Amp        | ~40         | AfIII/SapI     | MauBI/BbsI       | MreI/BsaI      |
| pJT375                                                                           | U2-P003-VioA-[TB1006]^2-TT7-U3-UX    | XbaI-BsaAI fragment of pVioA ligated into BamHI-BLUNT/XbaI digested pJT347.                                                                                                        | Amp        | ~40         | AfIII/SapI     | MauBI/BbsI       | MreI/BsaI      |
| pJT371                                                                           | U3-Ptrc-VioE-[TB1006]^2-TT7-U4-UX    | XbaI-BsaAI fragment of pVioE ligated into XbaI/EcoRV-digested pJT290.                                                                                                              | Amp        | ~40         | AfIII/SapI     | MauBI/BbsI       | MreI/BsaI      |
| <b>AND logic gate part vectors</b>                                               |                                      |                                                                                                                                                                                    |            |             |                |                  |                |
| Plasmid                                                                          | Part Contains:                       | Details                                                                                                                                                                            | Resistance | Copy Number | UN Digest Site | UN+1 Digest Site | UX Digest Site |
| pFL_A                                                                            | U1_HS4_U2                            | HS4 (derived from constructs in Lienert et al. 2013, Ref. #33 in main text).                                                                                                       | Amp        | ~500        | AscI/BspMI     | MauBI/BbsI       | MreI/BsaI      |
| pFL_B                                                                            | U2_HSVreporter_U3                    | 6xTAL118bs-spacer_TK_2xCFP-NLS_STOP_BGHterm_HS4 (derived from                                                                                                                      | Amp        | ~500        | AscI/BspMI     | MauBI/BbsI       | MreI/BsaI      |

|                                                       |                        |                                                                                                                              |                   |                                       |                       |                         |                       |
|-------------------------------------------------------|------------------------|------------------------------------------------------------------------------------------------------------------------------|-------------------|---------------------------------------|-----------------------|-------------------------|-----------------------|
|                                                       |                        | constructs in Lienert et al. 2013, Ref. #33 in main text).                                                                   |                   |                                       |                       |                         |                       |
| pFL_C1                                                | U3_C-input_U4          | CMV-intC-TAL118-a-C2_t2A_mCherry_BGHterm_HS4 (derived from constructs in Lienert et al. 2013, Ref. #33 in main text).        | Amp               | ~500                                  | Ascl/BspMI            | MauBI/BbsI              | MreI/BsaI             |
| pFL_C2                                                | U3_C-input_A_U4        | CMV-intC-TAL118-a-C2_BGHterm_HS4 (derived from constructs in Lienert et al. 2013, Ref. #33 in main text).                    | Amp               | ~500                                  | Ascl/BspMI            | MauBI/BbsI              | MreI/BsaI             |
| pFL_D1                                                | U4_N-input_U5          | CMV-TAL118-a-N2-intN_NLS_BGHterm_HS4 (derived from constructs in Lienert et al. 2013, Ref. #33 in main text).                | Amp               | ~500                                  | Ascl/BspMI            | MauBI/BbsI              | MreI/BsaI             |
| pFL_D2                                                | U4_mutN-input_U5       | CMV-mutTAL118-a-N2-intN_NLS_BGHterm_HS4 (derived from constructs in Lienert et al. 2013, Ref. #33 in main text).             | Amp               | ~500                                  | Ascl/BspMI            | MauBI/BbsI              | MreI/BsaI             |
| pFL_D3                                                | U4_N-input_A_U5        | CMV-TAL118-a-N2-intN_NLS_t2A_mCherry_BGHterm_HS4 (derived from constructs in Lienert et al. 2013, Ref. #33 in main text).    | Amp               | ~500                                  | Ascl/BspMI            | MauBI/BbsI              | MreI/BsaI             |
| pFL_D4                                                | U4_mutN-input_A_U5     | CMV-mutTAL118-a-N2-intN_NLS_t2A_mCherry_BGHterm_HS4 (derived from constructs in Lienert et al. 2013, Ref. #33 in main text). | Amp               | ~500                                  | Ascl/BspMI            | MauBI/BbsI              | MreI/BsaI             |
| <b>Plasmids obtained from companies or other labs</b> |                        |                                                                                                                              |                   |                                       |                       |                         |                       |
| <b>Plasmid</b>                                        | <b>Contains:</b>       | <b>From:</b>                                                                                                                 | <b>Resistance</b> | <b>Copy Number</b>                    | <b>UN Digest Site</b> | <b>UN+1 Digest Site</b> | <b>UX Digest Site</b> |
| pDHL374                                               | mCherry                | Per Malkus, Johan Paulsson Lab                                                                                               | Amp               | ~1-5                                  | NA                    | NA                      | NA                    |
| pEGFP                                                 | EGFP                   | Clontech                                                                                                                     | Amp               | ~500                                  | NA                    | NA                      | NA                    |
| pVioA                                                 | VioA-His6 in pET24b    | Tim Wencewicz, Chris Walsh Lab.                                                                                              | Kan               | ~40                                   | NA                    | NA                      | NA                    |
| pVioB                                                 | VioB-His6 in pET24b    | Tim Wencewicz, Chris Walsh Lab.                                                                                              | Kan               | ~40                                   | NA                    | NA                      | NA                    |
| pVioE                                                 | VioE-His6 in pET24b    | Tim Wencewicz, Chris Walsh Lab.                                                                                              | Kan               | ~40                                   | NA                    | NA                      | NA                    |
| pETDuet-1                                             | T7 expression cassette | Novagen                                                                                                                      | Amp               | ~40                                   | NA                    | NA                      | NA                    |
| pETCoco-1                                             | T7 expression cassette | Novagen                                                                                                                      | Cam               | ~1 (Amplifiable to 40 with arabinose) | NA                    | NA                      | NA                    |

**Table S4. Primers used in this study**

| Designation | Name              | Length | Sequence                                                                                       |
|-------------|-------------------|--------|------------------------------------------------------------------------------------------------|
| JT326       | Plac.Rev          | 52     | GAT CTC TAG AGG GGA ATT GTT ATC CGC TCA CAA TTC CAC ACA TTA TAC GAG C                          |
| JT328       | Plac.Fwd.19bpTRC  | 54     | GAC TAT CGA TGC TGT TGA CAA TTA ATC ATC CGG CTC GTA TAA TGT GTG GAA TTG                        |
| JT356       | BBa_B1006_TOP     | 63     | /5Phos/CTA GCA AAA AAA AAC CCC GCC CCT GAC AGG GCG GGG TTT TTT TTA CTA GTG CGG CCG CCT GCA     |
| JT357       | BBa_B1006_BOT     | 55     | /5Phos/GGC GGC CGC ACT AGT AAA AAA AAC CCC GCC CTG TCA GGG GCG GGG TTT TTT TTT G               |
| JT407       | ClalXbal_740_Top  | 69     | CGA TGC TGT TGA CAA TTA ATC ATC CGG CTC ATA AAA TTT GTG GAA TTG TGA GCG GAT AAC AAT TCC CCT    |
| JT408       | ClalXbal_740_Bot  | 71     | CTA GAG GGG AAT TGT TAT CCG CTC ACA ATT CCA CAA ATT TTA TGA GCC GGA TGA TTA ATT GTC AAC AGC AT |
| JT409       | ClalXbal_199_Top  | 69     | CGA TGC TGT TGA CAA TTA ATC ATC CGG CTC GTA GTG TCT GTG GAA TTG TGA GCG GAT AAC AAT TCC CCT    |
| JT410       | ClalXbal_199_Bot  | 71     | CTA GAG GGG AAT TGT TAT CCG CTC ACA ATT CCA CAG ACA CTA CGA GCC GGA TGA TTA ATT GTC AAC AGC AT |
| JT411       | ClalXbal_48_Top   | 69     | CGA TGC TGT TAC AAC TTA ATC ATC CGG CTC GTA TAA TGT GTG GAA TTG TGA GCG GAT AAC AAT TCC CCT    |
| JT412       | ClalXbal_48_Bot   | 71     | CTA GAG GGG AAT TGT TAT CCG CTC ACA ATT CCA CAC ATT ATA CGA GCC GGA TGA TTA AGT TGT AAC AGC AT |
| JT413       | ClalXbal_12_Top   | 69     | CGA TGC TGT TGG GGC TTA ATC ATC CGG CTC GTA TAA TGT GTG GAA TTG TGA GCG GAT AAC AAT TCC CCT    |
| JT414       | ClalXbal_12_Bot   | 71     | CTA GAG GGG AAT TGT TAT CCG CTC ACA ATT CCA CAC ATT ATA CGA GCC GGA TGA TTA AGC CCC AAC AGC AT |
| JT415       | ClalXbal_3_Top    | 69     | CGA TGC TGT TTT TAA TTA ATC ATC CGG CTC GTA TTG TAT GTG GAA TTG TGA GCG GAT AAC AAT TCC CCT    |
| JT416       | ClalXbal_3_Bot    | 71     | CTA GAG GGG AAT TGT TAT CCG CTC ACA ATT CCA CAT ACA ATA CGA GCC GGA TGA TTA ATT AAA AAC AGC AT |
| JT417       | ClalXbal_0.75_Top | 69     | CGA TGC TGT TTT GGT TTA ATC ATC CGG CTC CTA CTC TGT GTG GAA TTG TGA GCG GAT AAC AAT TCC CCT    |
| JT418       | ClalXbal_0.75_Bot | 71     | CTA GAG GGG AAT TGT TAT CCG CTC ACA ATT CCA CAC AGA GTA GGA GCC GGA TGA TTA AAC CAA AAC AGC AT |
| JT446       | VioB_RE_Fix_TOP   | 45     | /5Phos/AGC TCT CCA GAG AGG CCC TTG AGC ACC ACC ACC ACC ACT GAC                                 |
| JT447       | VioB_RE_Fix_BOT   | 45     | /5Phos/TCG AGT CAG TGG TGG TGG TGG TGG TGC TCA AGG GCC TCT CTG GAG                             |

**Table S5. gBlocks used in this study**

| gBlock Name    | Sequence                                                                                                                                                                                                                                                                                                                                                                                                                                                                                                                |
|----------------|-------------------------------------------------------------------------------------------------------------------------------------------------------------------------------------------------------------------------------------------------------------------------------------------------------------------------------------------------------------------------------------------------------------------------------------------------------------------------------------------------------------------------|
| gBlock_U1UX_A  | GACTGCATGCGCTCTTCTTAAGCATTACTCGCATCCATTCTCAGGCTGTCTCGTCTCGTCTCCGCGCGCGGTCTTCTGGAGATGATCAAACCTAGGCCAGGATA<br>CATAGATTACCACAACCTCCGAGCCCTTCCACCCGCCGGCGAGACCTCTAGAGATC                                                                                                                                                                                                                                                                                                                                                    |
| gBlock_U1UX_B  | GATCAGATCTGTGAGCGGCCGCATGAAAGCTTGCTCTTCTTAAGCATTACTCGCATCCATTCTCAGGCTGTCTCGTCTCGTCTCCGCGCGCGGTCTTCTGGAG<br>ATGATCAAACCTAGGCCAGGATACATAGATTACCACAACCTCCGAGCCCTTCCACCCGCCGGCGAGACCTCTAGAGTAC                                                                                                                                                                                                                                                                                                                              |
| gBlock_U1U2    | GACTCAATTGCTCTTCTTAAGCATTACTCGCATCCATTCTCAGGCTGTCTCGTCTCGTCTCCGCGCTGCATTAGGATCGATCTCGATCCCGCGAAATTAATACGACT<br>CACTATAGGGGAATTGTGAGCGGATAACAATTCCCCTCTAGAAATAATTTTGTTTAACTTTAAGAAGGAGATATACCATGGGCAGATCTACTAGTAGCAGCCATCA<br>CCATCATCACCACAGCGGATCCGCTAGCTGACTGCAGAGAAGCTTGCGGCCGCCCTCGAGTCGCCCTAGGCCGCTGAGCAATAACTAGCATAACCCCTTGGGGCC<br>TCTAAACGGGTCTTGAGGGGTTTTTGTGAAAACCTCAGGACCGGTGGCTGGGAGTTTCTGAGACGGAACAAACGCAGAATCCAAGCCGCGCGCGGTCTTCG<br>CCAGGATACATAGATTACCACAACCTCCGAGCCCTTCCACCCGCCGGCGAGACCCACGTAGTGAGTC  |
| gBlock_U2U3    | GACTCAATTGCTCTTCTTAAGGCTGGGAGTTCGTAGACGGAACAAACGCAGAATCCAAGCCGCCTGCATTAGGATCGATCTCGATCCCGCGAAATTAATACGAC<br>TCACTATAGGGGAATTGTGAGCGGATAACAATTCCCCTCTAGAAATAATTTTGTTTAACTTTAAGAAGGAGATATACCATGGGCAGATCTACTAGTAGCAGCCATC<br>ACCATCATCACCACAGCGGATCCGCTAGCTGACTGCAGAGAAGCTTGCGGCCGCCCTCGAGTCGCCCTAGGCCGCTGAGCAATAACTAGCATAACCCCTTGGGGC<br>CTCTAAACGGGTCTTGAGGGGTTTTTGTGAAAACCTCAGGACCGGTGGCACTGAAGGTCTCTAATCGCACTGGAACATCAAGGTCGCGCGCGCGGTCTTC<br>GCCAGGATACATAGATTACCACAACCTCCGAGCCCTTCCACCCGCCGGCGAGACCCACGTAGTGAGTC     |
| gBlock_U3U4    | GACTCAATTGCTCTTCTTAAGGCACTGAAGGTCTCAATCGCACTGGAACATCAAGGTGCGCCTGCATTAGGATCGATCTCGATCCCGCGAAATTAATACGAC<br>TCACTATAGGGGAATTGTGAGCGGATAACAATTCCCCTCTAGAAATAATTTTGTTTAACTTTAAGAAGGAGATATACCATGGGCAGATCTACTAGTAGCAGCCATC<br>ACCATCATCACCACAGCGGATCCGCTAGCTGACTGCAGAGAAGCTTGCGGCCGCCCTCGAGTCGCCCTAGGCCGCTGAGCAATAACTAGCATAACCCCTTGGGGC<br>CTCTAAACGGGTCTTGAGGGGTTTTTGTGAAAACCTCAGGACCGGTGCTGACCTCTGCCAGCAATAGTAAGACAACACGCAAAGTCCGCGCGCGGTCTTCG<br>CCAGGATACATAGATTACCACAACCTCCGAGCCCTTCCACCCGCCGGCGAGACCCACGTAGTGAGTC       |
| gBlock_U4U5    | GACTCAATTGCTCTTCTTAAGCTGACCTCCTGCCAGCAATAGTAAGACAACACGCAAAGTCCGCGCTGCATTAGGATCGATCTCGATCCCGCGAAATTAATACGAC<br>TCACTATAGGGGAATTGTGAGCGGATAACAATTCCCCTCTAGAAATAATTTTGTTTAACTTTAAGAAGGAGATATACCATGGGCAGATCTACTAGTAGCAGCCATC<br>ACCATCATCACCACAGCGGATCCGCTAGCTGACTGCAGAGAAGCTTGCGGCCGCCCTCGAGTCGCCCTAGGCCGCTGAGCAATAACTAGCATAACCCCTTGGGGC<br>CTCTAAACGGGTCTTGAGGGGTTTTTGTGAAAACCTCAGGACCGGTGGAGCCAACCTCCCTTTACAACCTCACTCAAGTCCGTTAGAGCGCGCGCGGTCTTCG<br>CCAGGATACATAGATTACCACAACCTCCGAGCCCTTCCACCCGCCGGCGAGACCCACGTAGTGAGTC |
| gBlock_U1U2_FL | CCCACAGCCAATTGACCTGCATGGCGCGCCATTACTCGCATCCATTCTCAGGCTGTCTCGTCTCGTCTCCGGAATTGCGGGCCGCTTCTAGAGTGATCCATC<br>CATGGGTGCTAGCTAAAGCTTAGCTCGAGTGGGTACCGTACCGGTAGAGATCTGAAGTAGTAGCGGCCGCTGCAGCCGCTGGGAGTTCTGAGACGGAACAAA<br>CGCAGAATCCAAGCCGCGCGCGGTCTTCGCCAGGATACATAGATTACCACAACCTCCGAGCCCTTCCACCCGCCGGCGAGACCATGCATCCACAGC                                                                                                                                                                                                    |
| gBlock_U2U3_FL | CCCACAGCCAATTGACCTGCATGGCGCGCCGCTGGGAGTTCTGAGACGGAACAAACGCAGAATCCAAGCCGGAATTGCGGGCCGCTTCTAGAGTGATCCAT<br>CCATGGGTGCTAGCTAAAGCTTAGCTCGAGTGGGTACCGTACCGGTAGAGATCTGAAGTAGTAGCGGCCGCTGCAGCCGCACTGAAGGTCTCTAATCGCACTG<br>GAAACATCAAGGTGCGCGCGCGGTCTTCGCCAGGATACATAGATTACCACAACCTCCGAGCCCTTCCACCCGCCGGCGAGACCATGCATCCACAGC                                                                                                                                                                                                    |
| gBlock_U3U4_FL | CCCACAGCCAATTGACCTGCATGGCGCGCCGCACTGAAGGTCTCAATCGCACTGGAACATCAAGGTGCGGGAATTGCGGGCCGCTTCTAGAGTGATCCAT<br>CCATGGGTGCTAGCTAAAGCTTAGCTCGAGTGGGTACCGTACCGGTAGAGATCTGAAGTAGTAGCGGCCGCTGCAGCCCTGACCTCCTGCCAGCAATAGTAAG<br>ACAACACGCAAAGTCCGCGCGCGGTCTTCGCCAGGATACATAGATTACCACAACCTCCGAGCCCTTCCACCCGCCGGCGAGACCATGCATCCACAGC                                                                                                                                                                                                    |
| gBlock_U4U5_FL | CCCACAGCCAATTGACCTGCATGGCGCGCCCTGACCTCTGCCAGCAATGAAGACAACACGCAAAGTCCGGAATTGCGGGCCGCTTCTAGAGTGATCCAT<br>CCATGGGTGCTAGCTAAAGCTTAGCTCGAGTGGGTACCGTACCGGTAGAGATCTGAAGTAGTAGCGGCCGCTGCAGCCGAGCCAACCTCCCTTTACAACCTCACT<br>CAAGTCCGTTAGAGCGCGCGCGGTCTTCGCCAGGATACATAGATTACCACAACCTCCGAGCCCTTCCACCCGCCGGCGAGACCATGCATCCACAGC                                                                                                                                                                                                    |
